# Supplementary material for: Cannabinoids and Prostate Cancer: A Systematic Review of Animal Studies
Source: PubMed Central journal article supplement (PMC7503992; doi:10.3390/ijms21176265), 2020-08-29
Supplement: ijms-21-06265-s001.pdf [file ijms-21-06265-s001.pdf]

## Supplementary data

**Table S1.** Search terms and Search Strategy documentation.

| Databases searched    | Key terms                    | Search terms used                                                                                                                                                        |
|-----------------------|------------------------------|--------------------------------------------------------------------------------------------------------------------------------------------------------------------------|
| <b>PubMed</b>         | Cannabis or cannabis-related | cannabinoids OR cannabis OR " <i>Cannabis sativa</i> " OR Tetrahydrocannabinol OR THC OR cannabidiol OR anandamide OR endocannabinoids OR 2-AG OR 2-Arachidonoylglycerol |
| <b>EMBASE</b>         |                              |                                                                                                                                                                          |
| <b>SCOPUS</b>         | Synthetic cannabinoids       | HU-210 OR "WIN-55" OR "212-2" OR "WIN-55,212-2" OR "methanandamide" OR "JWH-015"                                                                                         |
| <b>Web of Science</b> | Prostate cancer              | Prostatic Neoplasms [MeSH] OR "prostate cancer" OR prostate                                                                                                              |
|                       | Experimental                 | <i>in vivo</i> OR <i>ex vivo</i> OR animal OR experimental OR xenograft                                                                                                  |

PubMed strategy which was adapted for other databases:

1. cannabinoids OR cannabis OR "*Cannabis sativa*" OR Tetrahydrocannabinol OR THC OR cannabidiol OR anandamide OR endocannabinoids OR 2-AG OR 2-Arachidonoylglycerol
2. HU-210 OR "WIN-55" OR "212-2" OR "WIN-55,212-2" OR "methanandamide" OR "JWH-015"
3. #1 OR #2
4. Prostatic Neoplasms [MeSH] OR "prostate cancer" OR prostate
5. #3 AND #4
6. *in vivo* OR *ex vivo* OR animal OR experimental OR xenograft
7. #3 AND # 6
8. #5 AND #7
